# Supplementary material for: Post-synthetic modification of bis-iron(iii)-μ-oxo-porphyrin prisms to enhance oxygen reduction electrocatalysis
Source: Royal Society of Chemistry journal article supplement (doi:10.1039/d4qi01219d), 2024-01-01
Supplement: d4qi01219d1.pdf [file d4qi01219d1.pdf]

# Post-synthetic Modification of Bis-iron(III)- $\mu$ -oxo-porphyrin Prisms to Enhance Oxygen Reduction Electrocatalysis

Daoyang Zhang<sup>a</sup>, Lauren E. Rosch<sup>a</sup>, Matthew R. Crawley<sup>a</sup>, and Timothy R. Cook<sup>\*, a</sup>

<sup>a</sup>Department of Chemistry, University at Buffalo, The State University of New York, Buffalo, New York 14260, United States

Email: [trcook@buffalo.edu](mailto:trcook@buffalo.edu)

## Table of Contents

|                                                           |          |
|-----------------------------------------------------------|----------|
| <b><i>Spectroscopic characterization</i></b> .....        | <b>2</b> |
| <sup>1</sup> H NMR spectroscopy.....                      | 2        |
| DOSY .....                                                | 4        |
| VT-NMR.....                                               | 5        |
| Mass-spectrometry .....                                   | 6        |
| <b><i>Electrochemical measurements</i></b> .....          | <b>7</b> |
| Cyclic voltammetry: .....                                 | 7        |
| Linear sweep voltammetry .....                            | 9        |
| Koutecký-Levich analysis.....                             | 12       |
| Koutecký-Levich Analysis and Determination of $K_s$ ..... | 13       |
| UV-vis spectroelectrochemistry: .....                     | 14       |
| Computational: .....                                      | 16       |

# Spectroscopic characterization

## $^1\text{H}$ NMR spectroscopy

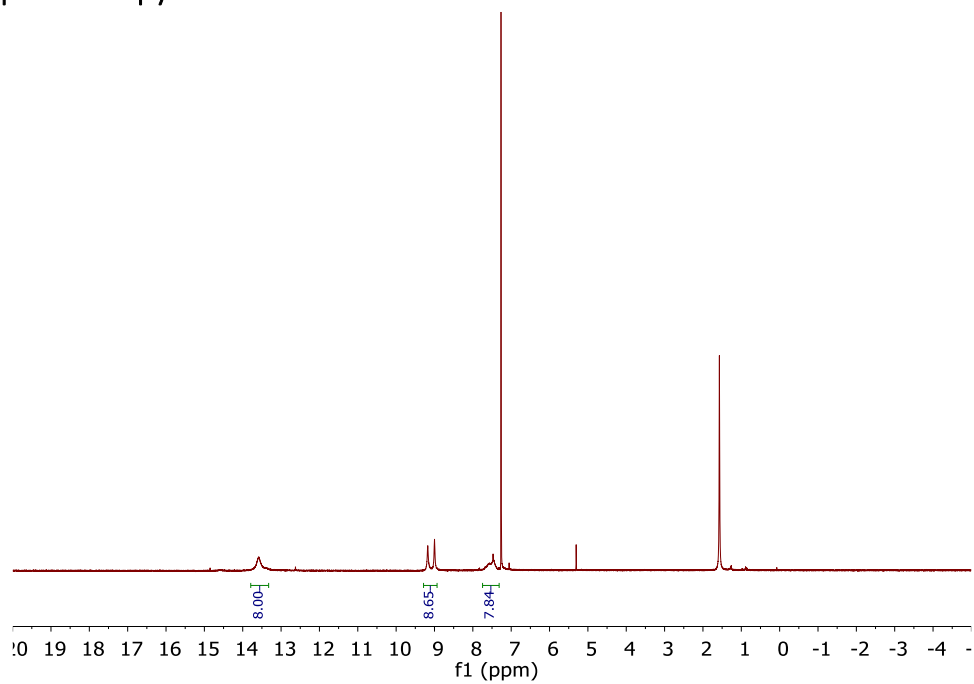

Figure S1.  $^1\text{H}$  NMR spectrum of  $\text{Fe}_2\text{O}$  TPYP ( $\text{CDCl}_3$ , 500 MHz, 298 K).

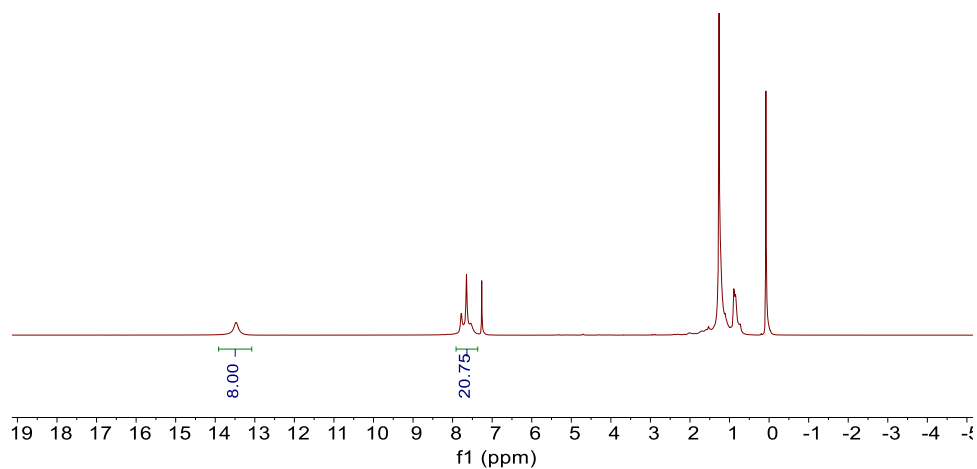

Figure S2.  $^1\text{H}$  NMR spectrum of  $\text{Fe}_2\text{O}$  TPP ( $\text{CDCl}_3$ , 500 MHz, 298 K).

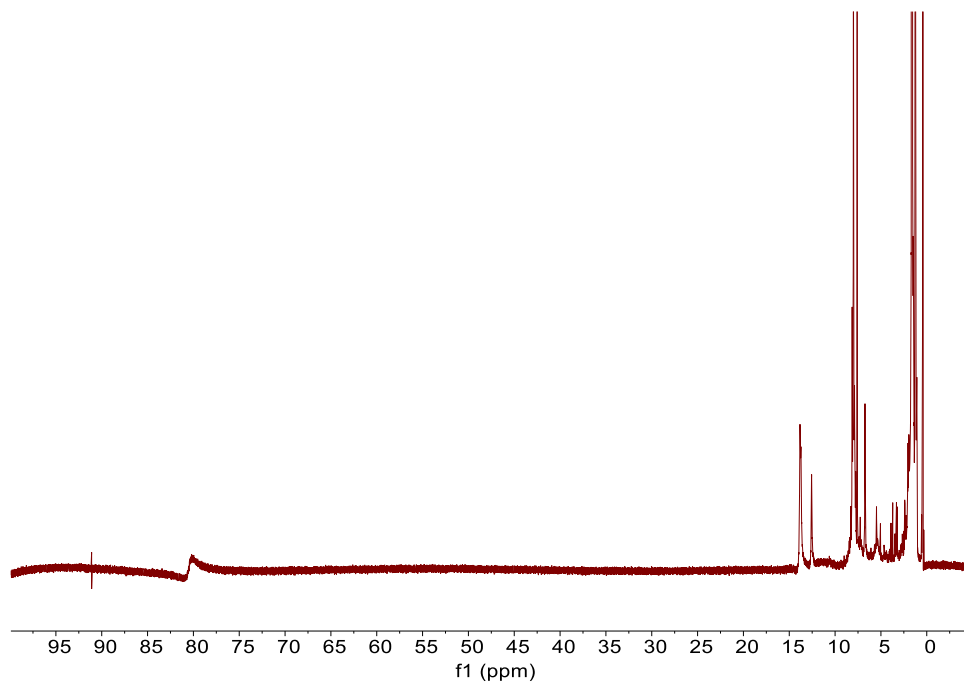

Figure S3.  $^1\text{H}$  NMR spectrum of FeTPPCI ( $\text{CDCl}_3$ , 500 MHz, 298 K).

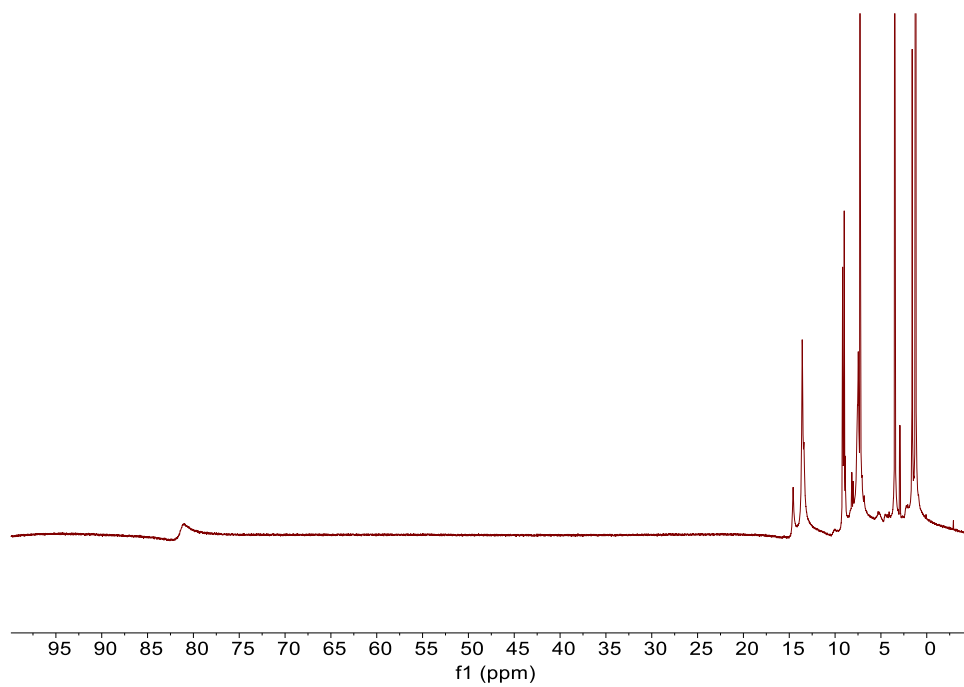

Figure S4.  $^1\text{H}$  NMR spectrum of FeTPyPCI ( $\text{CDCl}_3$ , 500 MHz, 298 K).

DOSY

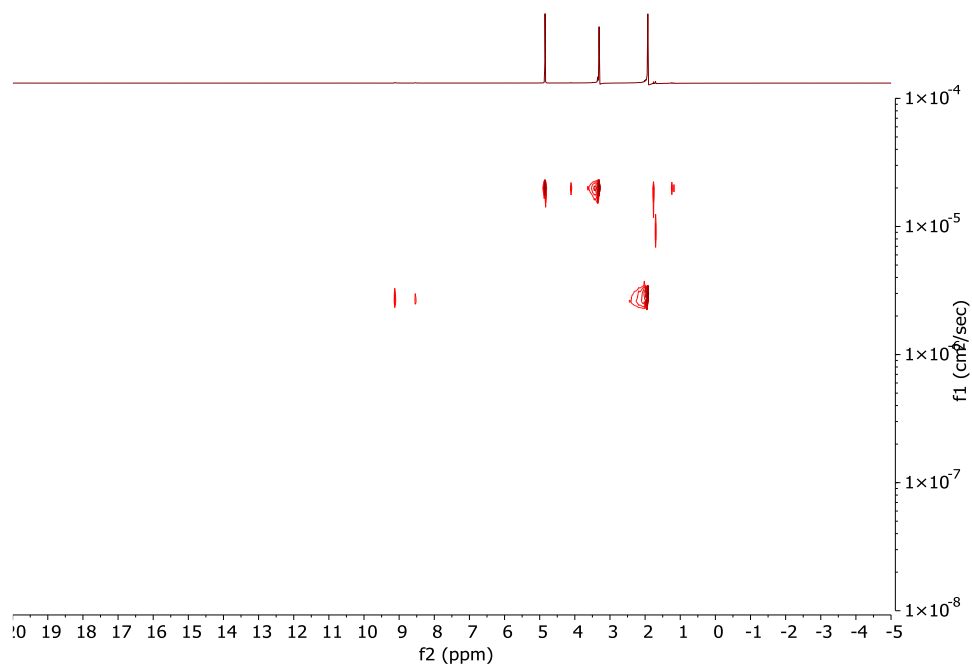

Figure S5. DOSY spectrum of Fe<sub>2</sub>O Rhoxo prism (CD<sub>3</sub>OD, 500 MHz, 298 K).

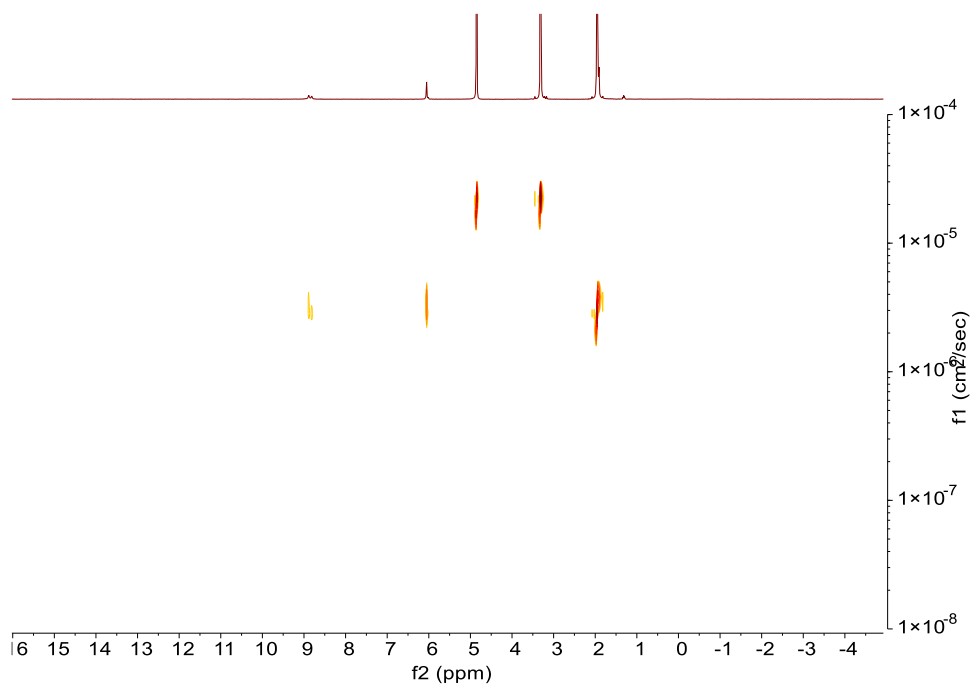

Figure S6. DOSY spectrum of Fe<sub>2</sub>O Rh-benzo prism (CD<sub>3</sub>OD, 500 MHz, 298 K).

VT-NMR

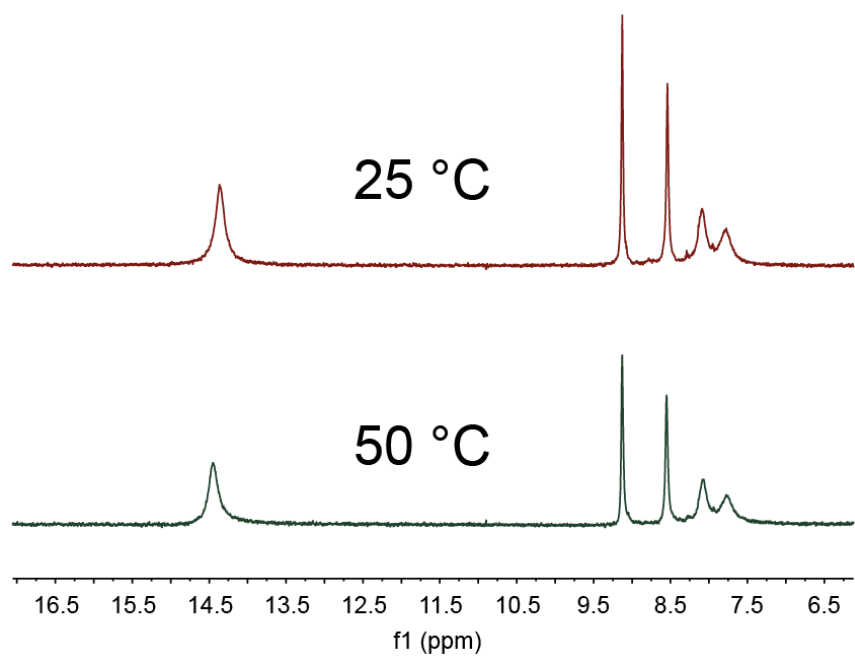

Figure S7. VT NMR of Fe<sub>2</sub>O Rhoxo prism. (CD<sub>3</sub>OD, 500 MHz).

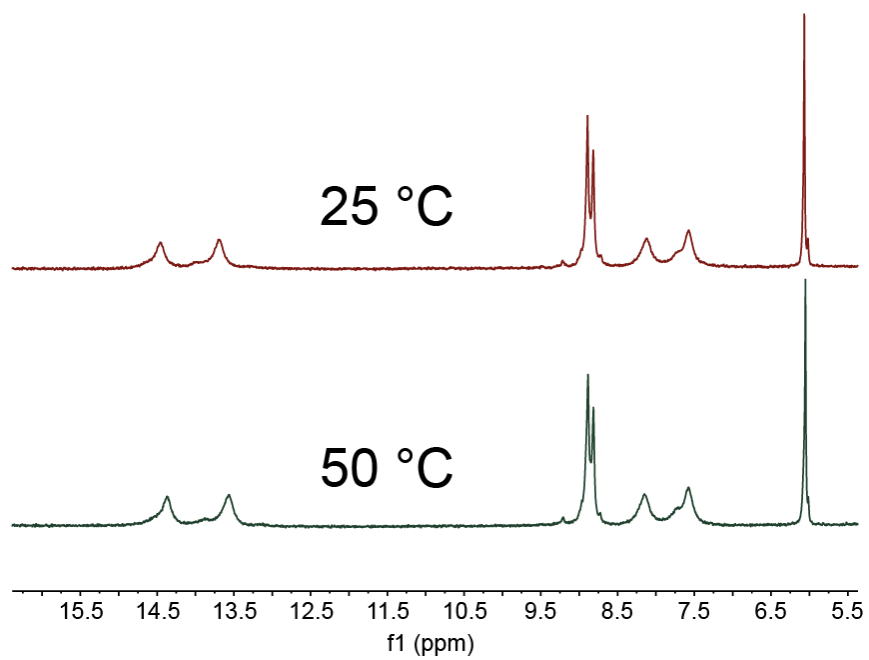

Figure S8. VT NMR OF Fe<sub>2</sub>O Rh-benzo prism. (CD<sub>3</sub>OD, 500 MHz).

## Mass-spectrometry

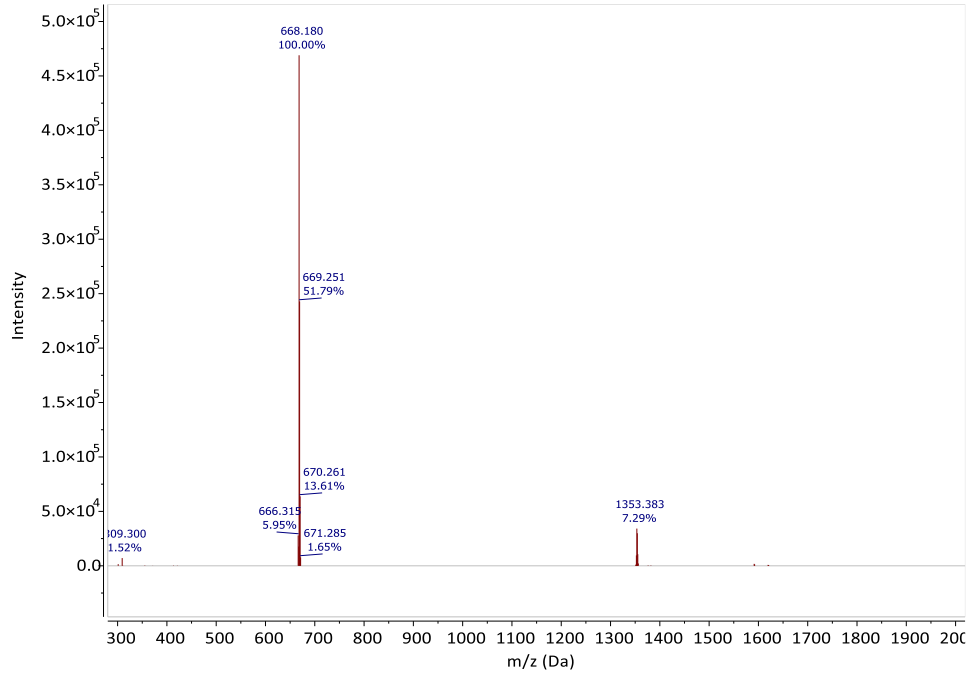

Figure S9. LTQ-MS of FeTPHP<sub>2</sub>O, m/z = 1353.383 was attributed to the M+H<sup>+</sup>.

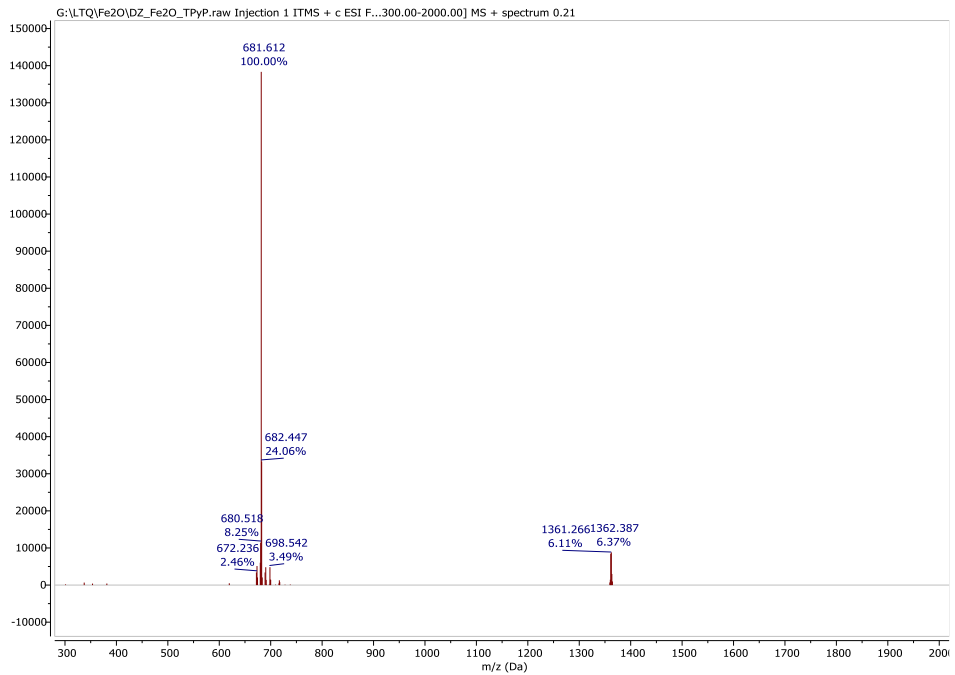

Figure S10. LTQ-MS of FeTPyP<sub>2</sub>O, m/z = 1361.226 was attributed to the M+H<sup>+</sup>.

## Electrochemical measurements

Cyclic voltammetry:

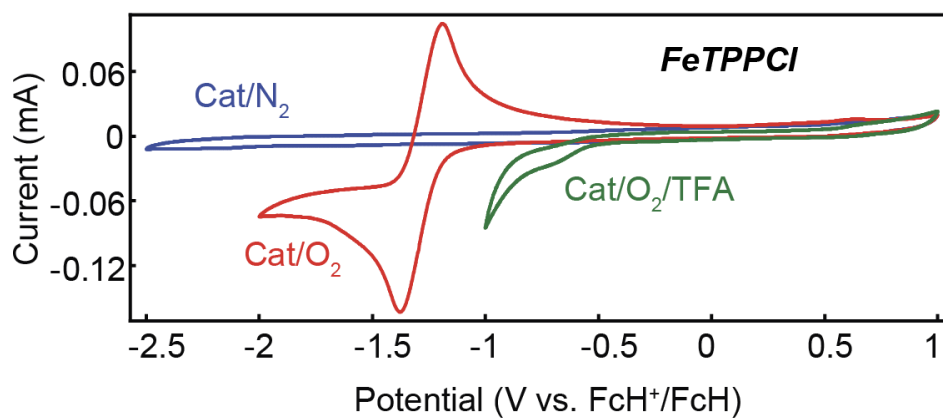

Figure S11. CV of FeTPPCI under homogeneous condition. 0.1 mM prism. All in DMF with 100 mM TBAPF<sub>6</sub>. Scan rate: 100 mV s<sup>-1</sup>.

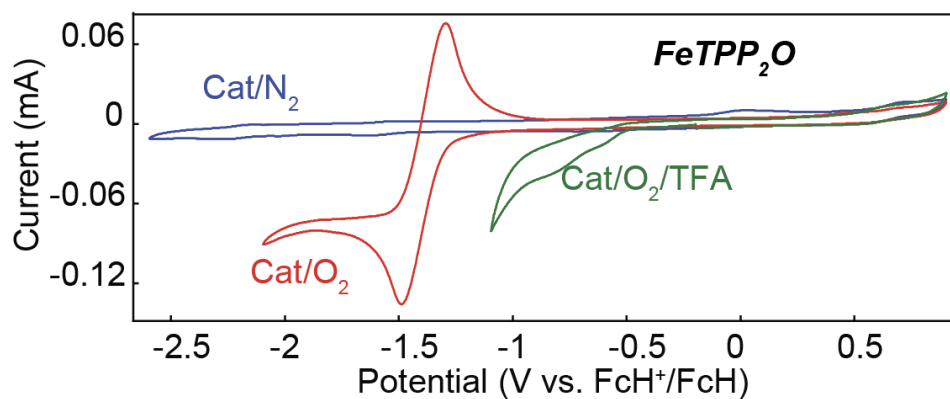

Figure S12. CV of FeTPP<sub>2</sub>O under homogeneous condition. 0.1 mM prism. All in DMF with 100 mM TBAPF<sub>6</sub>. Scan rate: 100 mV s<sup>-1</sup>.

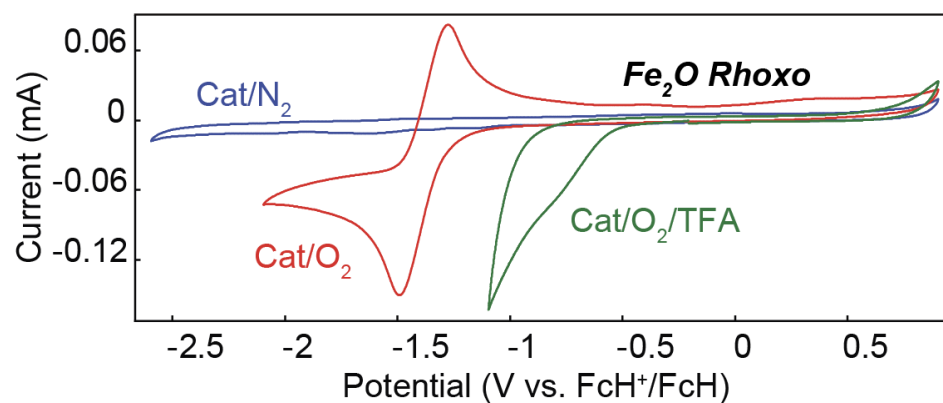

Figure S13. CV of Fe<sub>2</sub>O Rhoxo under homogeneous condition. 0.1 mM prism. All in DMF with 100 mM TBAPF<sub>6</sub>. Scan rate: 100 mV s<sup>-1</sup>.

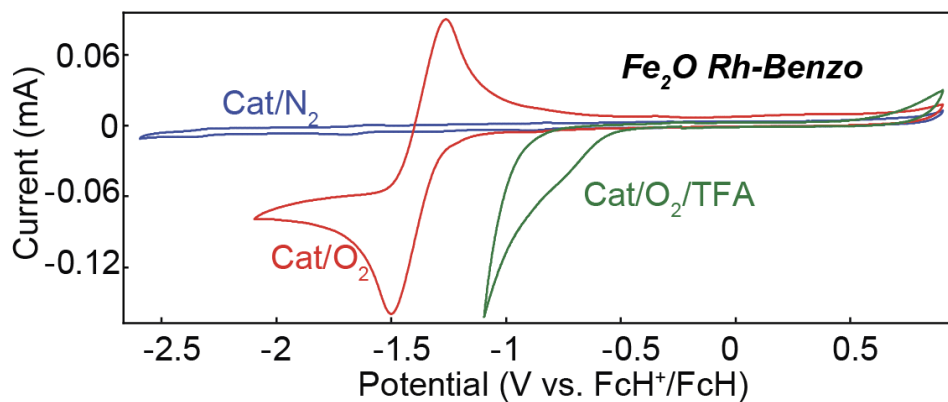

Figure S14. CV of  $\text{Fe}_2\text{O Rh-benzo}$  under homogeneous condition. 0.1 mM prism. All in DMF with 100 mM  $\text{TBAPF}_6$ . Scan rate: 100  $\text{mV s}^{-1}$ .

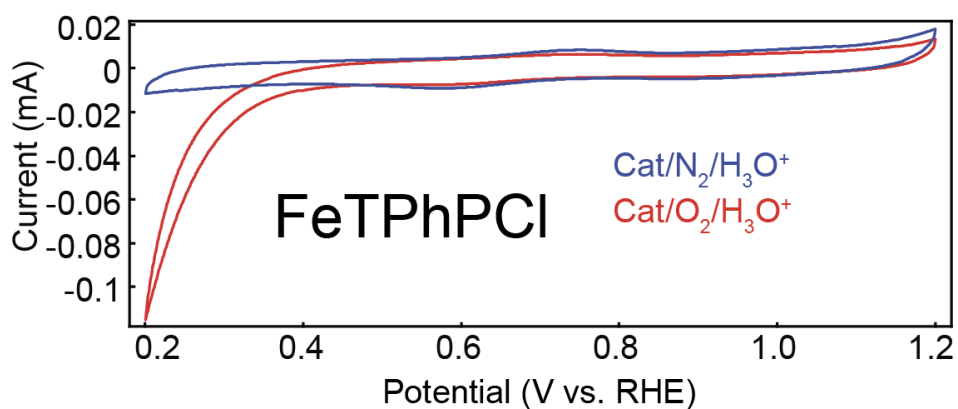

Figure S15. CV under heterogeneous conditions.  $\text{N}_2$  atmosphere (blue);  $\text{O}_2$ atmosphere (red) FeTPHPCI was immobilized in Nafion inks with carbon black and immersed in 0.5 M  $\text{H}_2\text{SO}_4$ . Scan rate: 100  $\text{mV s}^{-1}$ .

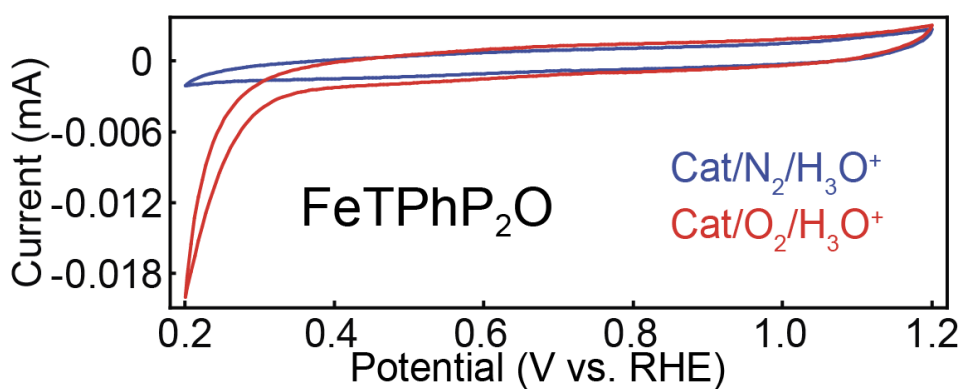

Figure S16. CV under heterogeneous conditions.  $\text{N}_2$  atmosphere (blue);  $\text{O}_2$ atmosphere (red) FeTPP $_2\text{O}$  was immobilized in Nafion inks with carbon black and immersed in 0.5 M  $\text{H}_2\text{SO}_4$ . Scan rate: 100  $\text{mV s}^{-1}$ .



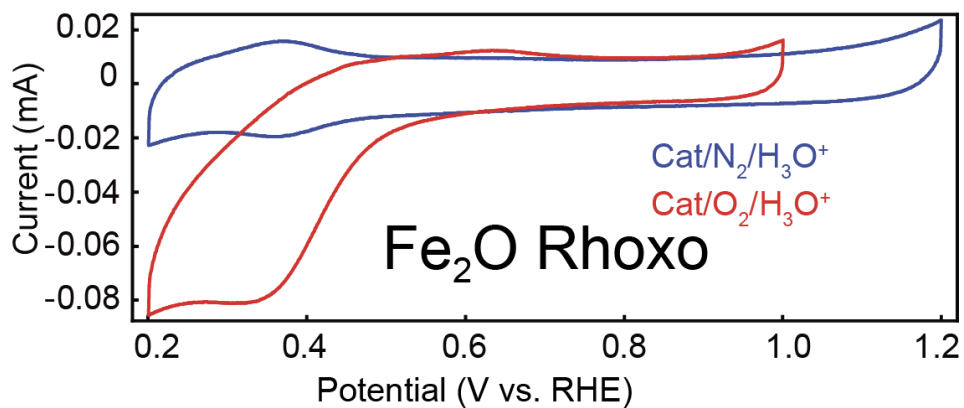

Figure S17. CV under heterogeneous conditions.  $N_2$  atmosphere (blue);  $O_2$ atmosphere (red)  $Fe_2O$  Rhoxo Prism was immobilized in Nafion inks with carbon black and immersed in 0.5 M  $H_2SO_4$ . Scan rate:  $100\text{ mV s}^{-1}$ .

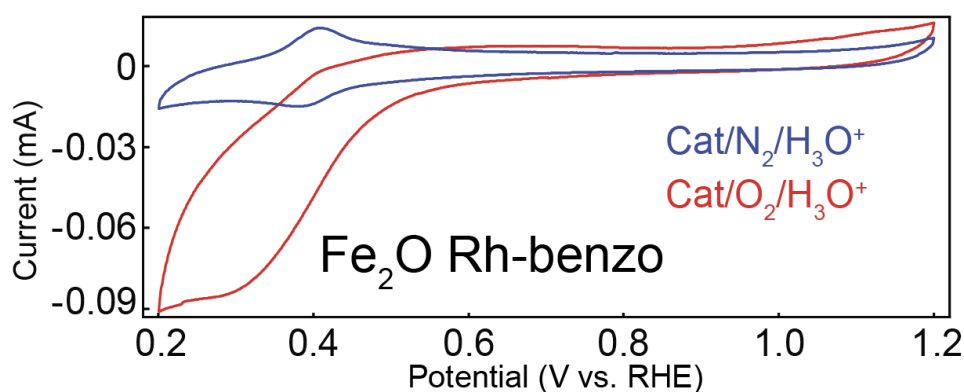

Figure S18. CV under heterogeneous conditions.  $N_2$  atmosphere (blue);  $O_2$ atmosphere (red)  $Fe_2O$  Rh-benzo Prism was immobilized in Nafion inks with carbon black and immersed in 0.5 M  $H_2SO_4$ . Scan rate:  $100\text{ mV s}^{-1}$ .

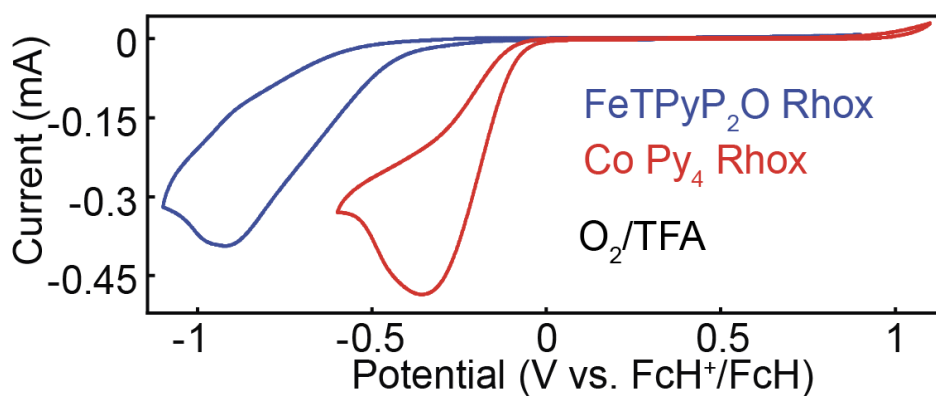

Figure S19. Catalytic CV under homogeneous condition. 0.1 mM prism,  $O_2$  atmosphere, 100 mM TFA. All in acetonitrile with 100 mM  $TBAPF_6$ . Scan rate:  $100\text{ mV s}^{-1}$ .

Linear sweep voltammetry

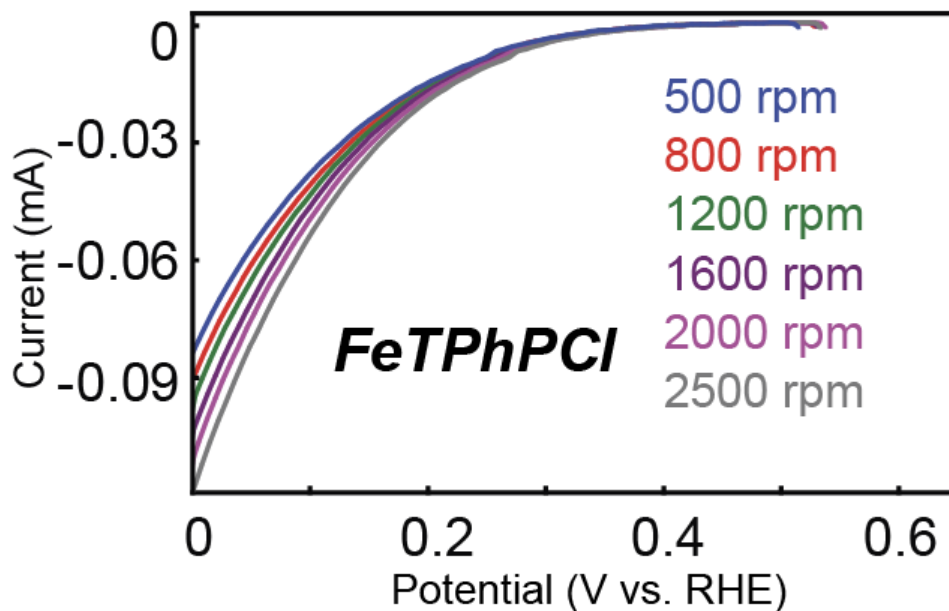

Figure S20. LSV of FeTPhPCI under heterogeneous conditions with different rotation rates. FeTPhPCI was immobilized in Nafion inks with carbon black and immersed in 0.5 M H<sub>2</sub>SO<sub>4</sub>. Scan rate: 20 mV s<sup>-1</sup>.

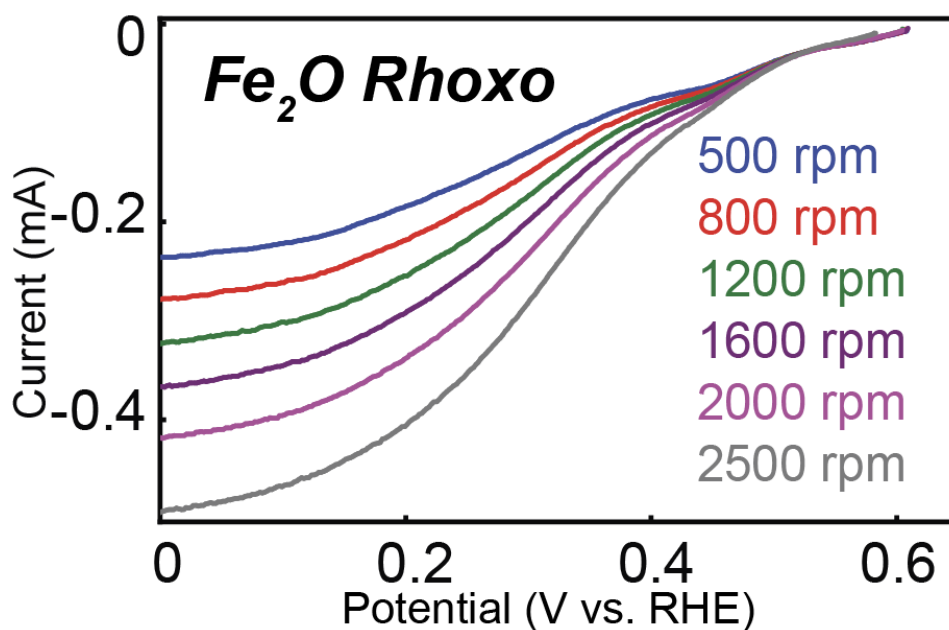

Figure S21. LSV of (FeTPhP)<sub>2</sub>O under heterogeneous conditions with different rotation rates. (FeTPhP)<sub>2</sub>O was immobilized in Nafion inks with carbon black and immersed in 0.5 M H<sub>2</sub>SO<sub>4</sub>. Scan rate: 20 mV s<sup>-1</sup>.

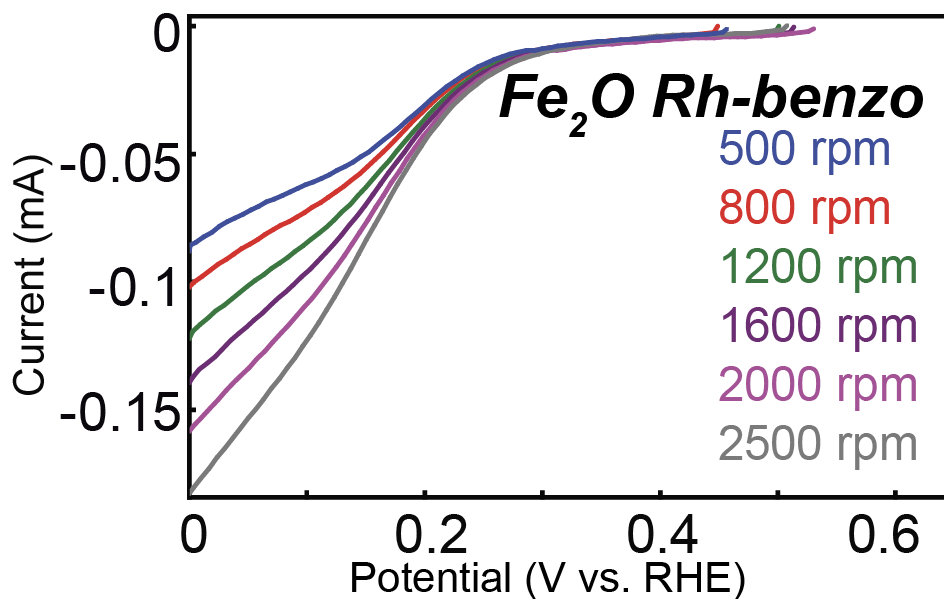

Figure S22. LSV of Fe<sub>2</sub>O Rhoxo under heterogeneous conditions with different rotation rates. Fe<sub>2</sub>O Rhoxo was immobilized in Nafion inks with carbon black and immersed in 0.5 M H<sub>2</sub>SO<sub>4</sub>. Scan rate: 20 mV s<sup>-1</sup>.

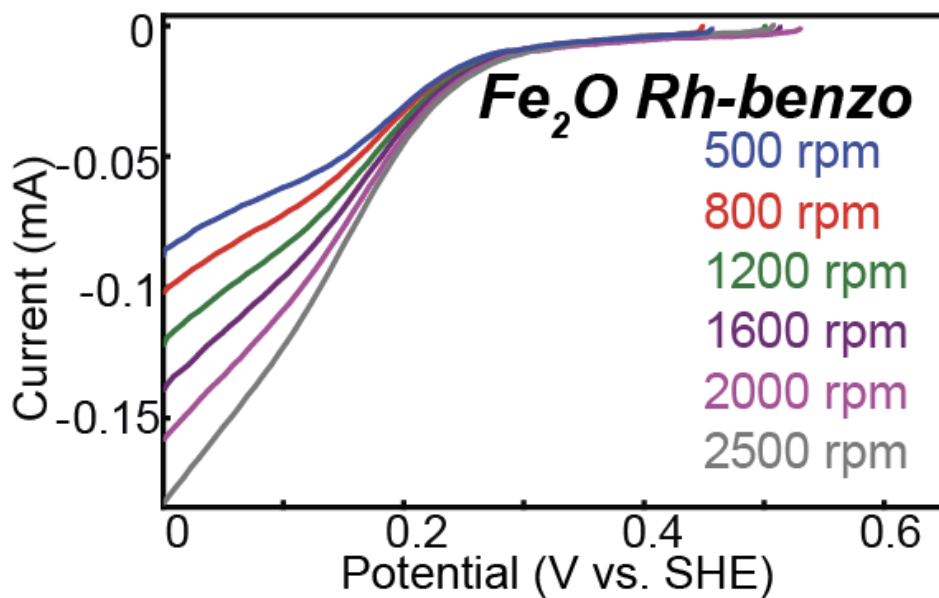

Figure S23. LSV of Fe<sub>2</sub>O Rh-benzo under heterogeneous conditions with different rotation rates. Fe<sub>2</sub>O Rh-benzo was immobilized in Nafion inks with carbon black and immersed in 0.5 M H<sub>2</sub>SO<sub>4</sub>. Scan rate: 20 mV s<sup>-1</sup>.

### Koutecký-Levich analysis

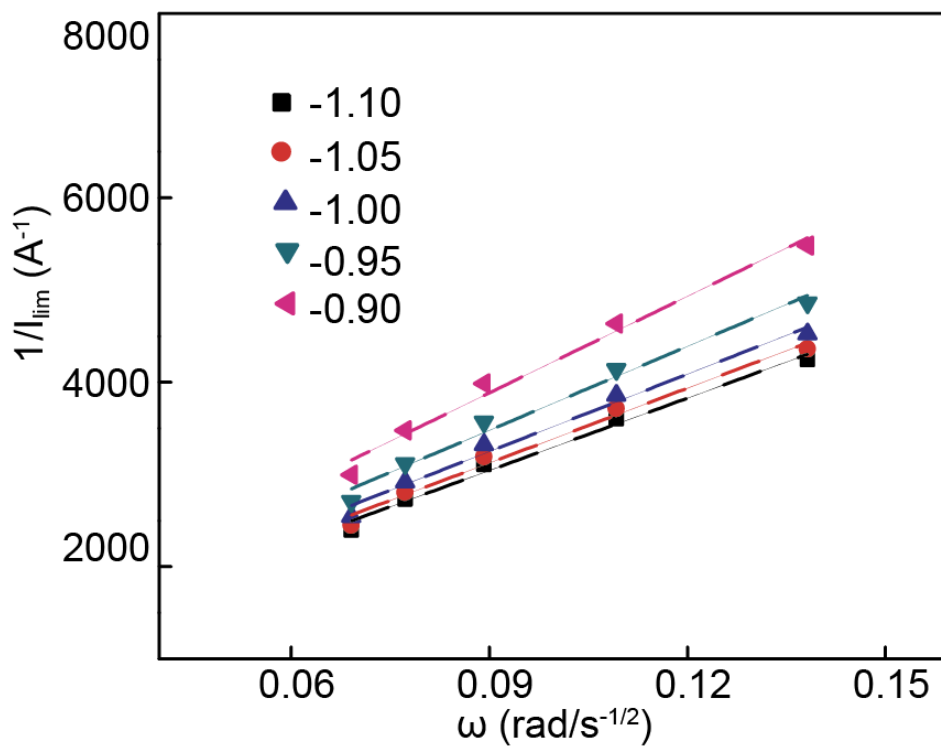

Figure S24. Koutecký-Levich plots of Fe<sub>2</sub>O Rhoxo Prism

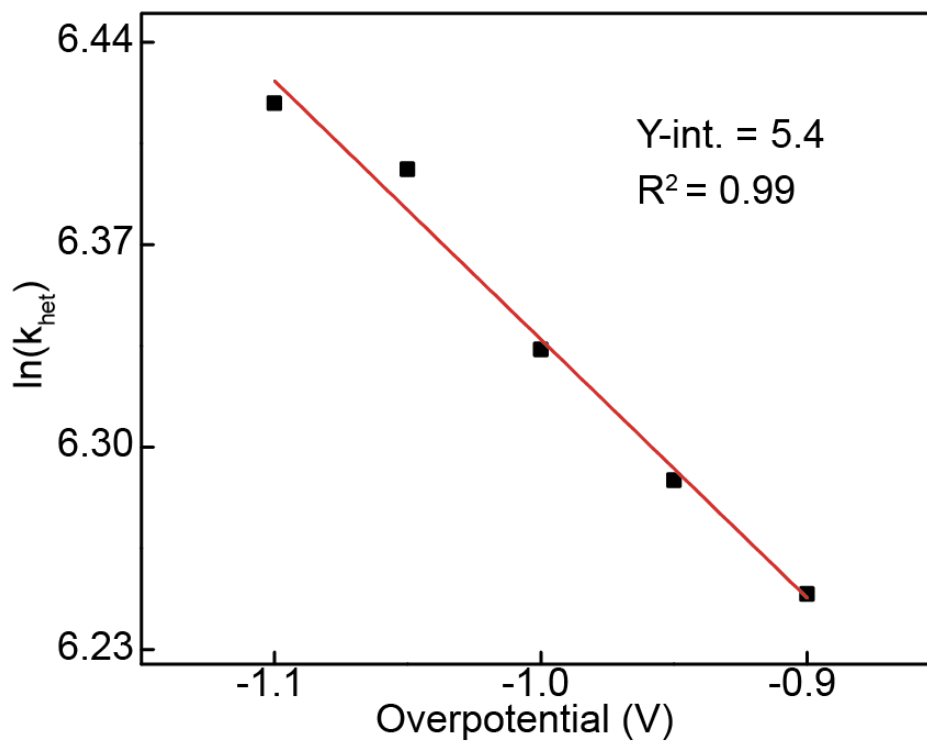

Figure S25. Plot of  $\ln(k_{net})$  vs. overpotential for the Fe<sub>2</sub>O Rhoxo Prism. The y-intercept of this plot is  $\ln(k_s)$ . The  $k_s$  value was calculated as  $2.6 \times 10^2$

## Koutecký-Levich Analysis and Determination of $k_s$

Figure S24 was constructed by collecting and plotting current response data at specific overpotentials across a range of rotation rates.

For the analysis using Equations S1-S5,  $i_{lim}$  is the limiting current taken from the plateau of the voltammograms (amps) shown in Figure S21,  $\omega$  is the rotation rate (rad/s),  $i_k$  is the kinetically limited current (amps),  $n$  is the number of electrons transferred as determined from Equation S4,  $F$  is the Faraday Constant,  $k_{het}$  is the heterogeneous electron transfer rate constant ( $M^{-1}s^{-1}$  due to the  $\Gamma_{cat}$  term),  $[O_2]$  is the concentration of  $O_2$  dissolved in solution (mol/L), and  $\Gamma_{cat}$  is the number of active catalyst sites per surface area ( $mol/cm^2$ ). For Equations S3A and S3B,  $\eta$  is the overpotential (V),  $a$  is the transfer coefficient,  $k_s$  is the standard rate constant (here in  $M^{-1}s^{-1}$ ).

We calculated a  $\Gamma_{cat}$  based on our catalyst loading in the catalyst ink. An assumption was made that all moles of catalyst added were active. Any inactive or inaccessible catalytic sites would result in our calculated  $k_{het}$  and  $k_s$  values being lower than their actual values. Thus, our values are a lower limit and actual catalyst kinetics must be either equal or better.

From the plot in Figure S24, values for  $i_k$  were extracted as the Y-intercepts for each overpotential trace. These values were then used along with Equation S2B to solve for values of  $k_{het}$  at each overpotential. These  $k_{het}$  values were used to construct Figure S25 from which a  $k_s$  value could be extracted from the Y-intercept using Equation S3B

From this plot, the Y-intercepts for the traces corresponding to each overpotential were determined. . Extract the Y-intercept as  $1/i_k$ , then use Equation S2 to obtain the value  $k_{het}$ . Finally, plot the  $\ln(k_{het})$  with overpotential as shown in Figure S25, to obtain the Y-intercept as the standard rate constant values  $k_s$ .<sup>1</sup>

$$\frac{1}{i_{lim}} = \omega^{-1/2} + \frac{1}{i_k} \quad \text{Equation S1}$$

$$i_k = nFAk_{het}[O_2]\Gamma_{cat} \quad \text{Equation S2A}$$

$$k_{het} = \frac{i_k}{nFA[O_2]\Gamma_{cat}} \quad \text{Equation S2B}$$

$$k_{het} = k_s e^{\frac{-a\eta}{RT}} \quad \text{Equation S3A}$$

$$\ln(k_{het}) = \frac{-a}{RT}\eta - \ln(k_s) \quad \text{Equation S3B}$$

$$n = 4 - 2\left(\frac{\%H_2O_2}{100}\right) \quad \text{Equation S4}$$

$$\%H_2O_2 = \frac{\frac{2i_{ring}}{N}}{i_{disk} + \frac{i_{ring}}{N}} \times 100 \quad \text{Equation S5.}$$

UV-vis spectroelectrochemistry:

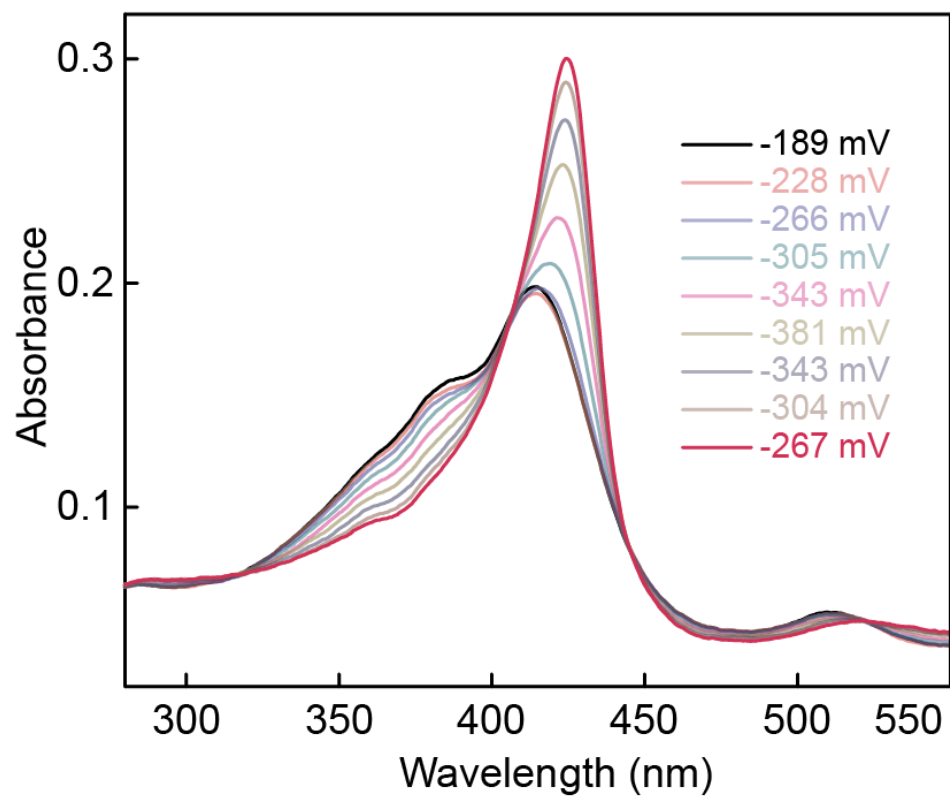

Figure S26. UV-vis spectroelectrochemistry of FeTPP<sub>2</sub>O. 0.01 mmol prism, N<sub>2</sub> atmosphere, 100 mM TFA. Acetonitrile with 100 mM TBABF<sub>4</sub>.

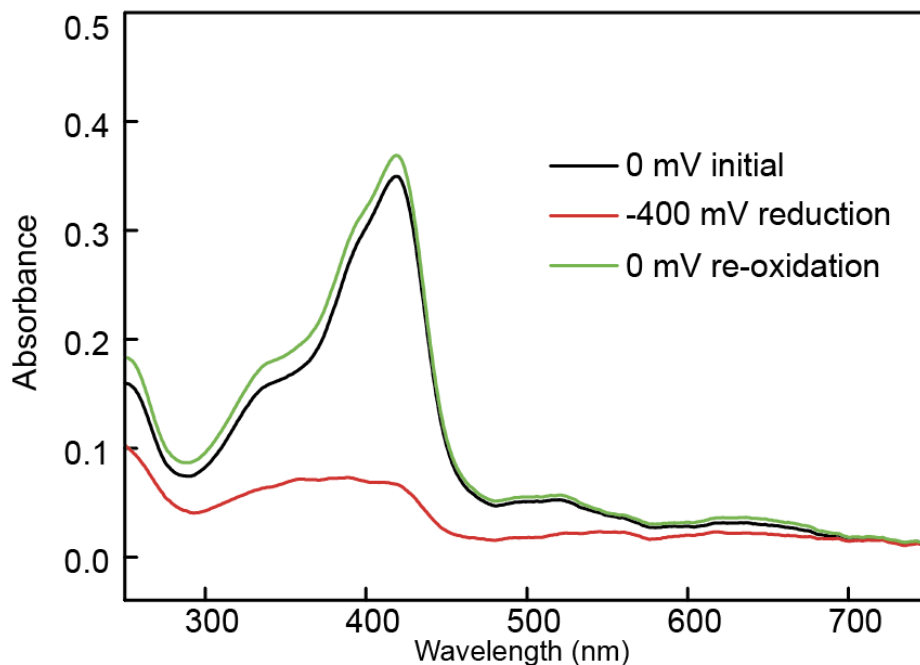

Figure S27. UV-vis spectroelectrochemistry of Fe<sub>2</sub>O Rhoxo. 0.01 mmol prism, N<sub>2</sub> atmosphere, 100 mM TFA. Acetonitrile with 100 mM TBABF<sub>4</sub>.

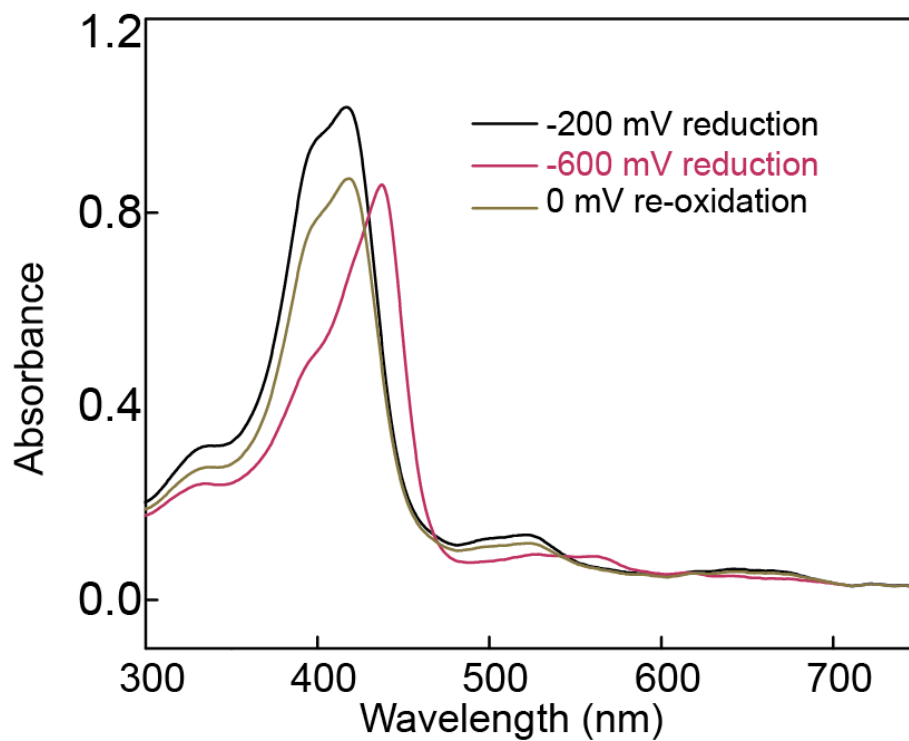

Figure S28. UV-vis spectroelectrochemistry of Fe<sub>2</sub>O Rhoxo. 0.016 mmol prism, N<sub>2</sub> atmosphere, 100 mM TFA. DMF with 100 mM TBABF<sub>4</sub>.

## Computational:

The structures of **Fe<sub>2</sub>O Rhoxo** and **Fe<sub>2</sub>O Rh-benzo** were optimized using ORCA 5.0.3,<sup>2</sup> at the r<sup>2</sup>SCAN-3c level of theory from Grimme with def2-mTZVPP basis set.<sup>3</sup> The solvent effects of methanol were treated using the conductor-like polarizable continuum model (CPCM). For the purposes of geometry optimization, we have treated the Fe<sub>2</sub>O prisms as spin singlets. The spin-states of the Fe<sub>2</sub>O prisms have not been rigorously determined in this work; however, given the NMR spectra, as well as the literature reports of strong antiferromagnetic coupling in Fe(III)–O–Fe(III) systems,<sup>4</sup> it is reasonable to treat them as such.

To address the possibility of so called “bowtie” complexes, computationally derived models were used. The structure of the **Zn Rh-benzo** was optimized at the r<sup>2</sup>scan level of theory with the def2-mTZVPP basis set. The diamagnetic Zn analogue was used to expedite the geometry optimization by alleviating any ambiguity in spin state. Using the optimized geometry as the starting point one of the porphyrin rings and three of the four clips were removed and the remaining clip was rotated about the Rh–N bond vector. The clip was rotated to be parallel with the plane of the porphyrin, moving the second Rh center to its most proximal position to the adjacent pyridyl ring. The Rh–N distance was found to be ~7.3 Å in comparison with the pyridyl N–N distance of ~10.9 Å. These findings suggest that the angularity and Rh–Rh distance of the Rh-benzo precludes the formation of “bowties” with TPyP-based donors as shown in Figure S29.

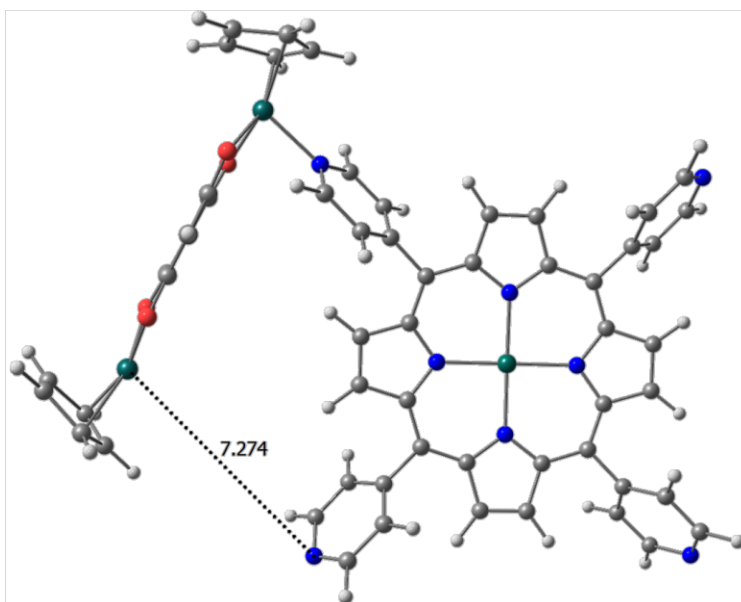

Figure S29. Optimized structure of potential bowtie structure with metallo tetrapyrrolyl porphyrin and Rh-benzo clip.

1. Zhang, J., *PEM Fuel Cell Electrocatalysts and Catalyst Layers: Fundamentals and Applications*. Springer London: 2008.
2. Neese, F.; Wennmo, F.; Becker, U.; Riplinger, C., The ORCA quantum chemistry program package. *The Journal of Chemical Physics* **2020**, *152* (22), 224108.
3. Grimme, S.; Hansen, A.; Ehlert, S.; Mewes, J.-M., r<sup>2</sup>SCAN-3c: A “Swiss army knife” composite electronic-structure method. *The Journal of Chemical Physics* **2021**, *154* (6), 064103.
4. Abdullin, D.; Fleck, N.; Klein, C.; Brehm, P.; Spicher, S.; Lützen, A.; Grimme, S.; Schiemann, O., Synthesis of  $\mu$ 2-Oxo-Bridged Iron(III) Tetraphenylporphyrin–Spacer–Nitroxide Dimers and their Structural and Dynamics Characterization by using EPR and MD Simulations. *Chem. - Eur. J.* **2019**, *25* (10), 2586-2596.
